# Supplementary material
Source: PubMed Central journal article supplement (PMC2941663)
Supplement: NIHMS232595-supplement-1_si_001.pdf [file NIHMS232595-supplement-1_si_001.pdf]

*Supplementary Information For:*

# Highly Selective Detection of Silver in the Low ppt Range with Ion-Selective Electrodes Based on Ionophore-Doped Fluorous Membranes

*Chun-Ze Lai,<sup>†</sup> Melissa A. Fierke,<sup>†</sup> Rosenildo Corrêa da Costa,<sup>§</sup> John A. Gladysz,<sup>§,‡</sup> Andreas Stein,<sup>†</sup> and Philippe Bühlmann<sup>\*,†</sup>*

Department of Chemistry, University of Minnesota, 207 Pleasant Street SE, Minneapolis, Minnesota, 55455, Institut für Organische Chemie, Friedrich-Alexander-Universität Erlangen-Nürnberg, Henkestrasse 42, 91054 Erlangen, Germany, Department of Organic Chemistry, Texas A&M University, P. O. Box 30012, College Station, Texas, 77842

\*Corresponding author. E-mail: buhlmann@umn.edu

<sup>†</sup> University of Minnesota

<sup>§</sup> Friedrich-Alexander-Universität Erlangen-Nürnberg

<sup>‡</sup> Texas A&M University

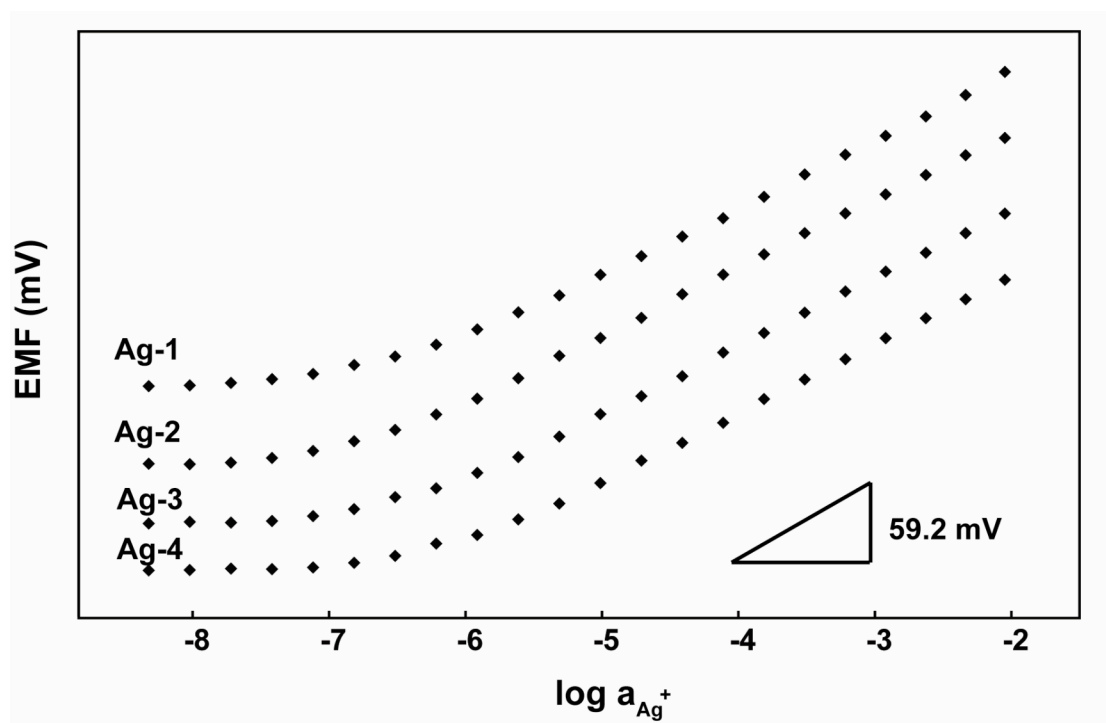

**Figure S1.** Potentiometric  $\text{Ag}^+$  response of ISEs with an inner filling solution containing 0.1 mM  $\text{AgNO}_3$  and a sensing membrane of perfluoroperhydrophenanthrene doped with 1.0 mM borate salt (**3**) and one of four ionophores (3.0 mM) after conditioning in a 10 mM  $\text{AgNO}_3$  solution for 5 h.

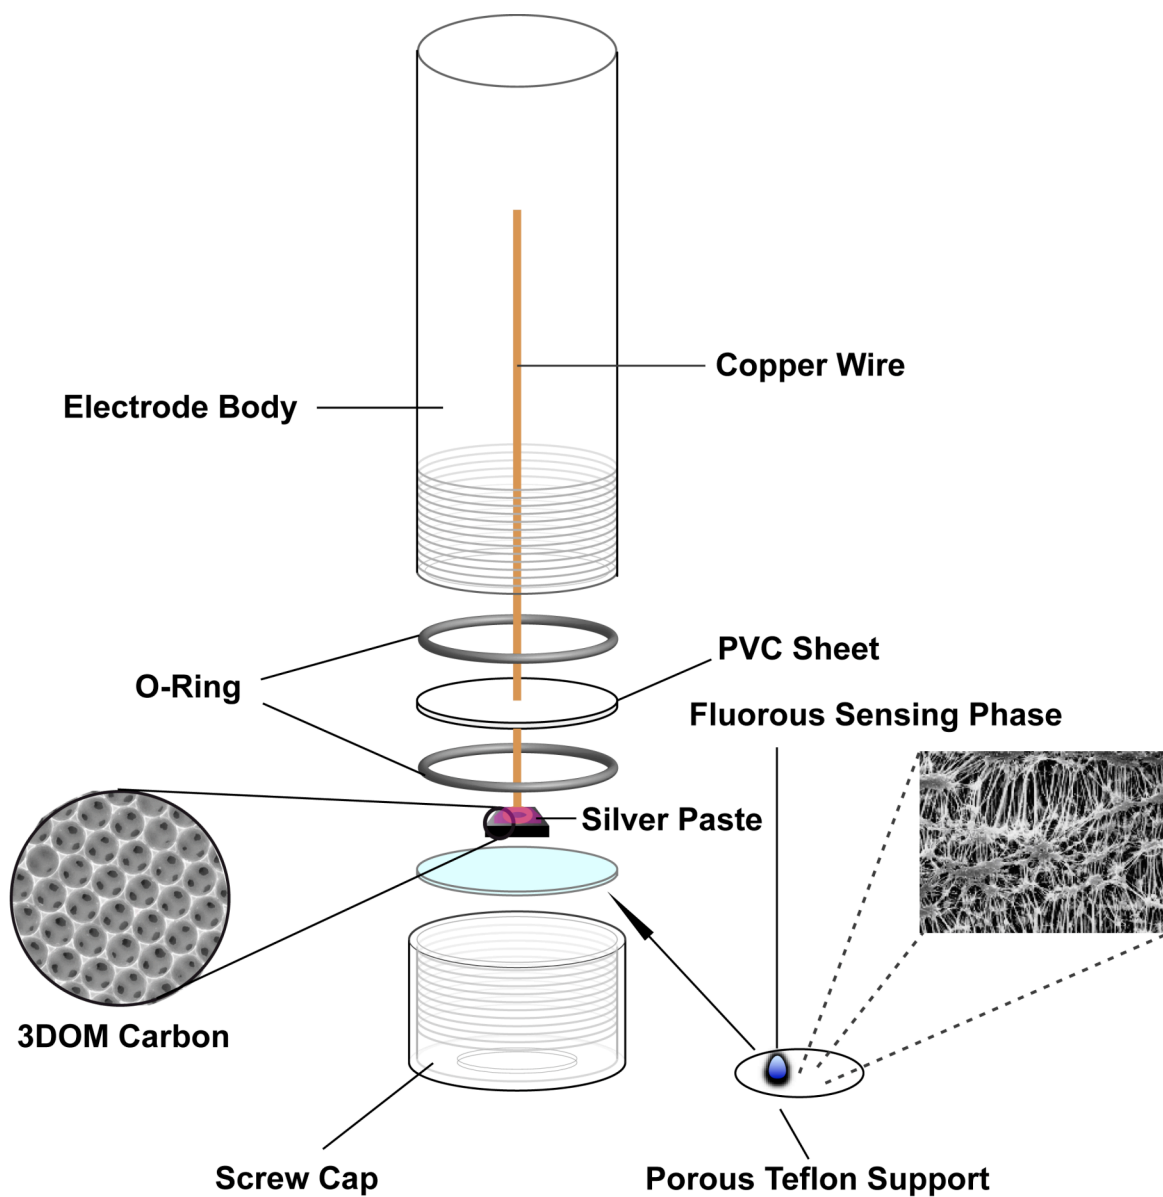

**Figure S2.** Schematic setup of 3DOM carbon-contacted  $\text{Ag}^+$ -selective electrode with a fluorous membrane, as used for the low detection limit experiments.

---

**Table S1.** Silver Ion Selectivities ( $\log K_{\text{Ag},\text{J}}^{\text{pot}}$ ) of Fluorous Ionophore-Doped Electrode Membranes and an Analogous Fluorous Ionophore-Free Ion-Exchanger Membrane with Perfluoroperhydrophenanthrene (**1**) as Membrane Matrix

| membrane composition |                   | $\text{Ag}^+$ selectivity ( $\log K_{\text{Ag},\text{J}}^{\text{pot}}$ ) |                   |                   |
|----------------------|-------------------|--------------------------------------------------------------------------|-------------------|-------------------|
| ionophore            | ionic sites       | $\text{K}^+$                                                             | $\text{Na}^+$     | $\text{Cu}^{2+}$  |
| none                 | <b>3</b> (1.0 mM) | $-2.89 \pm 0.04$                                                         | $-3.96 \pm 0.08$  | $-3.74 \pm 0.06$  |
| <b>Ag-1</b> (3.0 mM) | <b>3</b> (1.0 mM) | $-4.78 \pm 0.07$                                                         | $-6.42 \pm 0.09$  | $-7.03 \pm 0.15$  |
| <b>Ag-2</b> (3.0 mM) | <b>3</b> (1.0 mM) | $-5.97 \pm 0.07$                                                         | $-7.60 \pm 0.09$  | $-8.09 \pm 0.19$  |
| <b>Ag-3</b> (3.0 mM) | <b>3</b> (1.0 mM) | $-9.45 \pm 0.15$                                                         | $-10.93 \pm 0.21$ | $-11.22 \pm 0.21$ |
| <b>Ag-4</b> (3.0 mM) | <b>3</b> (1.0 mM) | $-11.60 \pm 0.13$                                                        | $-12.94 \pm 0.14$ | $-13.04 \pm 0.22$ |

---
